# Supplementary material for: Investigating the Role of Necroptosis in the Immunological Microenvironment of Periodontitis
Source: Research Square preprint supplement (doi:10.21203/rs.3.rs-5436262/v1), 2024-12-02
Supplement: Supplementary file 1 [file 560b72dce2863981a38dde50.docx]

**Table S1 Primers sequence used for qRT-PCR in this study**

| Genes |  | Sequence |
| --- | --- | --- |
| GAPDH | Forward | 5'- GTCTCCTCTGACTTCAACAGCG -3' |
|  | Reverse | 5'- TGTAGACCATGTAGTTGAGGTCA -3' |
| ZBP1 | Forward | 5'- AACATGCAGCTACAATTCCAGA-3' |
|  | Reverse | 5'- AGTCTCGGTTCACATCTTTTGC-3' |
| SLC39A7 | Forward | 5'- GGACACGCTCACAGTCATACA-3' |
|  | Reverse | 5'- CTCCTCGCCTCTTCTGAACC-3' |
| TNFRSF1B | Forward | 5'- CGGGCCAACATGCAAAAGTC-3' |
|  | Reverse | 5'- CAGATGCGGTTCTGTTCCC-3' |
| APP | Forward | 5'- CAAGCAGTGCAAGACCCATC -3' |
|  | Reverse | 5'- AGAAGGGCATCACTTACAAACTC -3' |
| BNIP3 | Forward | 5'- CAGGGCTCCTGGGTAGAACT -3' |
|  | Reverse | 5'- CTACTCCGTCCAGACTCATGC -3' |
| HSPA4 | Forward | 5'- GCATCGAGACTATCGCTAATGAG-3' |
|  | Reverse | 5'- TGCAAGGTTAGATTTTTCTGCCT -3' |
| MLKL | Forward | 5'- AGGAGGCTAATGGGGAGATAGA -3' |
|  | Reverse | 5'- TGGCTTGCTGTTAGAAACCTG -3' |
